# Supplementary material for: Changes in Milk Protein Functionality at Low Temperatures and Rennet Concentrations
Source: MDPI journal article supplement (doi:10.3390/foods13030447), 2024-01-30
Supplement: s1 [file s1]

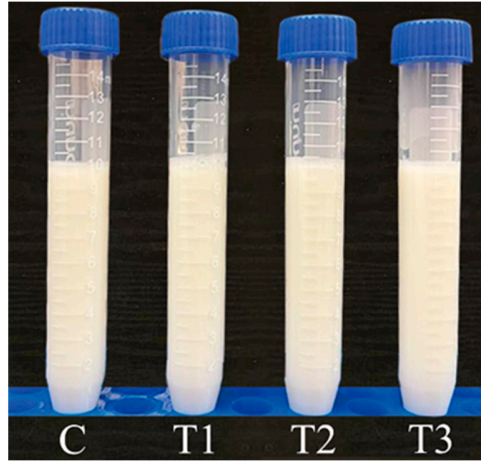

**Figure S1.** No changes in the water holding capacity of SMS (control and rennet-added samples) after centrifuging at 24 h incubation
